# Supplementary material
Source: PubMed Central journal article supplement (PMC4666743)
Supplement: NIHMS721151-supplement-07.pdf [file NIHMS721151-supplement-07.pdf]

658 Supplemental Figure 1: Physical stability of single (A) and double (B) emulsions in DMEM. The  
659 emulsions were fabricated, and incubated, in the exact same manner as the emulsions  
660 contained in ARSs. Sizing was done with a Coulter Counter. Data are shown as mean  $\pm$   
661 standard deviation for n = 5.

662  
663  
664  
665
